# Supplementary material for: MYC2 Transcription Factors TwMYC2a and TwMYC2b Negatively Regulate Triptolide Biosynthesis in Tripterygium wilfordii Hairy Roots
Source: PubMed Central journal article supplement (PMC8067133; doi:10.3390/plants10040679), 2021-04-01
Supplement: plants-10-00679-s001.pdf [file plants-10-00679-s001.pdf]

## Supplementary materials

**Table S1.** Full names of several functional pathway genes in triptolide biosynthesis

| Genes                   | Full names                                              |
|-------------------------|---------------------------------------------------------|
| <i>TwHMGR1</i>          | 3-hydroxy-3-methylglutaryl- coenzyme A reductase gene   |
| <i>TwHMGS</i>           | 3-hydroxy-3-methylglutaryl-coenzyme A synthase gene     |
| <i>TwDXR</i>            | 1-deoxy-d-xylulose-5-phosphate reductoisomerase gene    |
| <i>TwDXS1/2</i>         | 1-deoxy-d-xylulose 5-phosphate synthase genes           |
| <i>TwHDR</i>            | 4-hydroxy-3-methylbut-2-enyl diphosphate reductase gene |
| <i>TwIDI</i>            | isopentenyl pyrophosphate isomerase gene                |
| <i>TwGGPPS1/4/8</i>     | geranylgeranyl diphosphate synthase genes               |
| <i>TwTPS7/7v2/9/9v2</i> | <i>normal</i> -copalyl diphosphate synthase genes       |
| <i>TwTPS27/27v2</i>     | mitradiene synthase genes                               |
| <i>TwCYP728B70</i>      | cytochrome P450 gene                                    |

**Table S2.** The numbers of various E-box motifs in the potential promoter sequences of *TwTPS7*, *TwTPS9*, *TwDXR*, and *TwHMGR1* (2000 bp nucleotides upstream of their start condon ATG).

| Name      | E-box Sequences      | Numbers of E-box |               |              |                |
|-----------|----------------------|------------------|---------------|--------------|----------------|
|           |                      | <i>TwTPS7</i>    | <i>TwTPS9</i> | <i>TwDXR</i> | <i>TwHMGR1</i> |
| E1        | CAGATG/CATCTG        | 1                | 0             | 1            | 0              |
| <b>E2</b> | <b>CACATG/CATGTG</b> | <b>3</b>         | <b>2</b>      | <b>2</b>     | <b>2</b>       |
| E3        | CAAATG/CATTTG        | 2                | 4             | 2            | 3              |
| <b>E4</b> | <b>CACGTT/AACGTG</b> | <b>0</b>         | <b>0</b>      | <b>0</b>     | <b>1</b>       |
| E5        | CAATTG               | 1                | 2             | 2            | 0              |
| E6        | CATATG               | 1                | 3             | 0            | 2              |
| E7        | CAACTG/CAGTTG        | 1                | 0             | 1            | 1              |
| E8        | CAAGTG/CACTTG        | 1                | 1             | 1            | 1              |
| E9        | CAGGTG/CACCTG        | 0                | 1             | 1            | 0              |
| E10       | CAGCTG               | 0                | 0             | 0            | 1              |
| G-box     | CACGTG               | 0                | 0             | 0            | 2              |
| Total     |                      | 10               | 13            | 10           | 13             |

Note: These pathway genes *TwTPS7*, *TwTPS9*, *TwDXR*, and *TwHMGR1* are located in the chromosome of 21, 21, 18, and 7, respectively. The 2000 bp nucleotides upstream of their start condon ATG in their genomic sequences were analyzed as the potential promoter sequence.

**Table S3.** Primers used in this study

| Primers                                                          | Sequence (5' to 3')                                        |
|------------------------------------------------------------------|------------------------------------------------------------|
| <b>5'/3'-RACE PCR</b>                                            |                                                            |
| MYC2-5'-R1-1066                                                  | GACGAAGGTGATTTGGGATATGGACTC                                |
| MYC2-5'-R2-795                                                   | GGCACCACCATTACTGAAATTGAACA                                 |
| MYC2-3'-F1-1192                                                  | TTTGGGGAGAGTAAGAGGACTGCTACCA                               |
| MYC2-3'-F2-1578                                                  | TGCTGTTGTTCCCTAATGTGTCCAAGATG                              |
| <b>Full-length CDS PCR</b>                                       |                                                            |
| MYC2a-F                                                          | ATGACGGACTACCGGCTCCCAGTAT                                  |
| MYC2a-R                                                          | TTACCGAGCACCAACCCTGGATTGT                                  |
| MYC2b-F                                                          | CCGGTGCATGAAATGACGGACTA                                    |
| MYC2b-R                                                          | GTCCTATCGAGAATCACCAATCCTGG                                 |
| <b>Construction of the subcellular localization vectors</b>      |                                                            |
| MYC2a-sub-F                                                      | AGATTTATAAAAAAAAAAAAAAGAATTCATGACGGACTACCGGCTCC            |
| MYC2a-sub-R                                                      | TCCTCGCCCTTGCTCACCATGGTACCCCGAGCACCAACCCTGG                |
| MYC2b-sub-F                                                      | AGATTTATAAAAAAAAAAAAAAGAATTCATGACGGACTACCGGCTAC            |
| MYC2b-sub-R                                                      | TCCTCGCCCTTGCTCACCATGGTACCTCGAGAATCACCAATCCTGG             |
| <b>qRT-PCR</b>                                                   |                                                            |
| EF1 $\alpha$ -F                                                  | CCAAGGGTGAAAGCAAGGAGAGC                                    |
| EF1 $\alpha$ -R                                                  | CACTGGTGGTTTTGAGGCTGGTATCT                                 |
| MYC2a-q-F                                                        | CTGAACCTAAGGGAAAATAGGATCGG                                 |
| MYC2a-q-R                                                        | TAACAGAAGGATGGCCAATACAAAA                                  |
| MYC2b-q-F                                                        | AGCTGAACTAAGGGAAAATCGC                                     |
| MYC2b-q-R                                                        | GGAACAGTGAAGCAGGATTACC                                     |
| TwTPS27a/b-q-F                                                   | ATGAATCAACGGCCCTTGACT                                      |
| TwTPS27a/b-q-R                                                   | TCCTAATCGCTGCATCGACTC                                      |
| TwTPS7/9-q-F                                                     | GCTAGAAAAAGACGATTCCGAGC                                    |
| TwTPS7/9-q-R                                                     | ATAGCTTGCAAGAATGGCGAATC                                    |
| TwHMGR1-q-F                                                      | CATGTTTGAACCTGCTTGGGG                                      |
| TwHMGR1-q-R                                                      | GGCTTTTACAAGCTGTCCAG                                       |
| TwDXR-q-F                                                        | TCAAGGATTGCCAGAGGG                                         |
| TwDXR-q-R                                                        | ATGAATGATAGACTGCGGATG                                      |
| <b>Construction of bait vectors</b>                              |                                                            |
| 3×E2-AbAi-HindIII-F                                              | AGCTTATTACATGTAAATTCACATGTAAATTCACATGTAAC                  |
| 3×E2-AbAi-XhoI-R                                                 | TCGAGTTACATGTGAATTTACATGTGAATTTACATGTGAATA                 |
| 3×E4-AbAi-HindIII-F                                              | AGCTTCATCACGTTAGACATCACGTTAGACATCACGTTAGAC                 |
| 3×E4-AbAi-XhoI-R                                                 | TCGAGTCTAACGTGATGTCTAACGTGATGTCTAACGTGATGA                 |
| <b>Construction of prey vectors</b>                              |                                                            |
| MYC2a-AD-F                                                       | GCCATGGAGGCCAGTGAATTCATGACGGACTACCGGCTCC                   |
| MYC2a-AD-R                                                       | ACGATTCATCTGCAGCTCGAGTTACCGAGCACCAACCCTGG                  |
| MYC2b-AD-F                                                       | GCCATGGAGGCCAGTGAATTCATGACGGACTACCGGCTAC                   |
| MYC2b-AD-R                                                       | ACGATTCATCTGCAGCTCGAGCTATCGAGAATCACCAATCCTGG               |
| <b>Construction of effector vectors (overexpression vectors)</b> |                                                            |
| MYC2a-OE-F                                                       | GGGGACAAGTTTGTACAAAAAAGCAGGCTTCACCATGACGGACTACCGGCTCCAGTAT |
| MYC2a-OE-R                                                       | GGGGACCACTTTGTACAAGAAAGCTGGGTCTTACCGAGCACCAACCCTGGATTGT    |
| MYC2b-OE-F                                                       | GGGGACAAGTTTGTACAAAAAAGCAGGCTTCACCCGGTGCATGAAATGATGA       |

|                                                                 | CGGACTA                                                                   |
|-----------------------------------------------------------------|---------------------------------------------------------------------------|
| MYC2b-OE-R                                                      | <u>GGGGACCACTTTGTACAAGAAAGCTGGGTC</u> <u>CTA</u> TCGAGAATCACCAAT<br>CCTGG |
| <b>Construction of reporter vectors (promoter::GUS vectors)</b> |                                                                           |
| 27aP-F                                                          | <u>GACCATGATTACGCCAAGCTT</u> GTACTGAATAAATAAATTAAATTGCTACAG<br>TTATCG     |
| 27aP-R                                                          | <u>ACCACCCGGGGATCCTCTAGAA</u> ATTCCCAGAAGAAAGGTGTGATTTT                   |
| 27bP-F                                                          | <u>GACCATGATTACGCCAAGCTTT</u> GGGCCCTCTTTATTGAAAACAAAAAT                  |
| 27bP-R                                                          | <u>ACCACCCGGGGATCCTCTAGAA</u> ATTCCCAGAAGAAAGGTGTGATTTT                   |
| <b>Construction of RNAi vectors</b>                             |                                                                           |
| MYC2-RNAi-1-F                                                   | <u>GGGGACAAGTTTGTACAAAAAAGCAGGCT</u> TCTATGCCCTACGTGCTGTT                 |
| MYC2-RNAi-1-R                                                   | <u>GGGGACCACTTTGTACAAGAAAGCTGGGTT</u> GGATGGTTCCTTTTGCTAC                 |
| MYC2-RNAi-2-F                                                   | <u>GGGGACAAGTTTGTACAAAAAAGCAGGCT</u> CTGGGTCATGTTTTCGGGTT                 |
| MYC2-RNAi-2-R                                                   | <u>GGGGACCACTTTGTACAAGAAAGCTGGGTT</u> GGTGTGGCTGCTGCTATTG                 |
| MYC2-RNAi-3-F                                                   | <u>GGGGACAAGTTTGTACAAAAAAGCAGGCT</u> TCTCAGCCTTCTGTCACTTTCAA              |
| MYC2-RNAi-3-R                                                   | <u>GGGGACCACTTTGTACAAGAAAGCTGGGTC</u> ACTCAGTATCAGTCACCTCTTC              |

Note: The underlined sequences represent homologous recombination sequence. The start/stop codons are marked with red color. The E-box sequences are marked with green color. The restriction site sequences are marked with purple color.

Query=  
(623 letters)

Database: D:\BioEdit\_7.0.9\database\Unigene.fa  
67,931 sequences; 47,438,532 total letters

| Sequences producing significant alignments: | Score<br>(bits) | E<br>Value |
|---------------------------------------------|-----------------|------------|
| comp41180_c0_seq5                           | 656             | 0.0        |
| comp40130_c0_seq4                           | 243             | 2e-064     |
| comp39963_c0_seq1                           | 140             | 2e-033     |
| comp20233_c0_seq1                           | 104             | 2e-022     |
| comp32866_c0_seq1                           | 102             | 9e-022     |
| comp236553_c0_seq1                          | 94              | 3e-019     |
| comp34060_c0_seq2                           | 93              | 6e-019     |
| comp31125_c0_seq1                           | 86              | 5e-017     |
| comp77870_c0_seq1                           | 78              | 2e-014     |
| comp38681_c1_seq5                           | 77              | 4e-014     |
| comp30553_c0_seq1                           | 74              | 3e-013     |
| comp23259_c0_seq1                           | 70              | 4e-012     |
| comp159021_c0_seq1                          | 70              | 4e-012     |
| comp32172_c0_seq2                           | 68              | 2e-011     |
| comp380288_c0_seq1                          | 67              | 3e-011     |
| comp10848_c0_seq1                           | 67              | 4e-011     |
| comp148314_c0_seq1                          | 62              | 8e-010     |
| comp222427_c0_seq1                          | 62              | 8e-010     |
| comp33182_c0_seq1                           | 62              | 1e-009     |
| comp32780_c0_seq2                           | 55              | 1e-007     |

**Figure S1.** Results of tBLASTn search in *T. wilfordii* transcriptome library (SRX472292). The project No. of *T. wilfordii* transcriptome library used in this study is SRX472292. The query sequence is the protein sequence of AtMYC2 (also called BAA25078, 623aa).

A

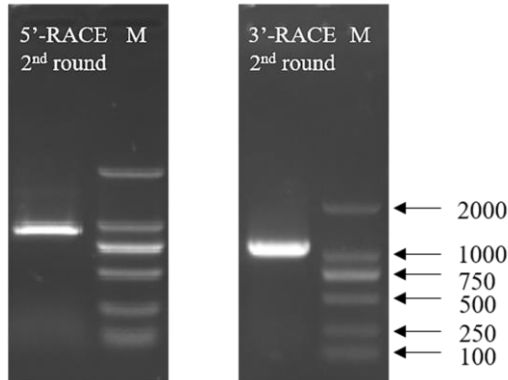

B

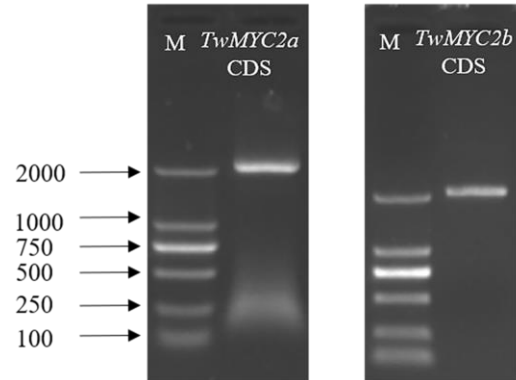

**Figure S2.** Identification of the PCR products for the second round of the 5'/3'-rapid amplification of cDNA ends (5'/3'-RACE) (A) and the full-length coding sequence (CDS) (B) of candidate genes (*TwMYC2a/b*). M: DL2000 Marker. The primers for cloning the full-length CDS of *TwMYC2a* were MYC2a-F and MYC2a-R (Table S2), and the MYC2b-F and MYC2b-R (Table S2) for *TwMYC2b*.

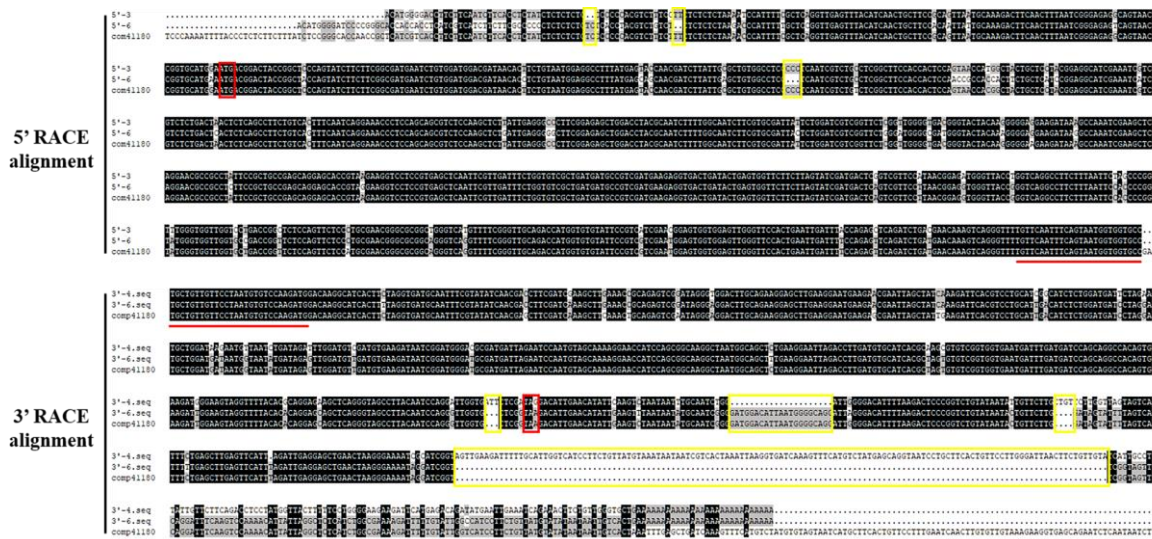

**Figure S3.** Sequence alignment between the 5'/3'-RACE sequences and the candidate gene sequence. The primers used for 2<sup>nd</sup> round 5'/3'-RACE PCR are marked with a single red line. The start codon (ATG) and stop codon (TAG/TAA) are marked with a red box. The gaps in sequence alignment are marked with a yellow box.

*TwMYC2a*  
CDS

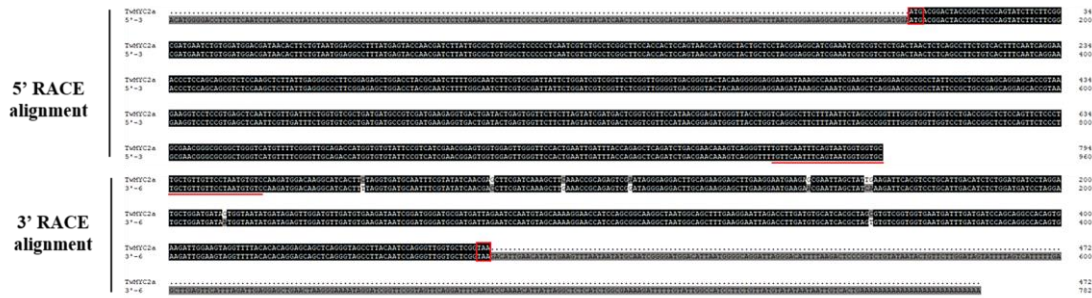

*TwMYC2b*  
CDS

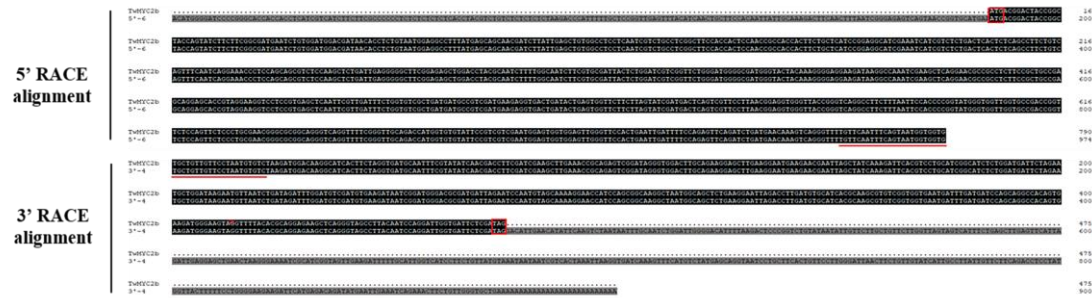

**Figure S4.** Sequence alignment between the 5'/3'-RACE sequences and the partial CDSs of *TwMYC2a* and *TwMYC2b*. The primers used for 2<sup>nd</sup> round 5'/3'-RACE PCR are marked with a sigle red line. The start codon (ATG) and stop codon (TAA/TAG) are marked with a red box.

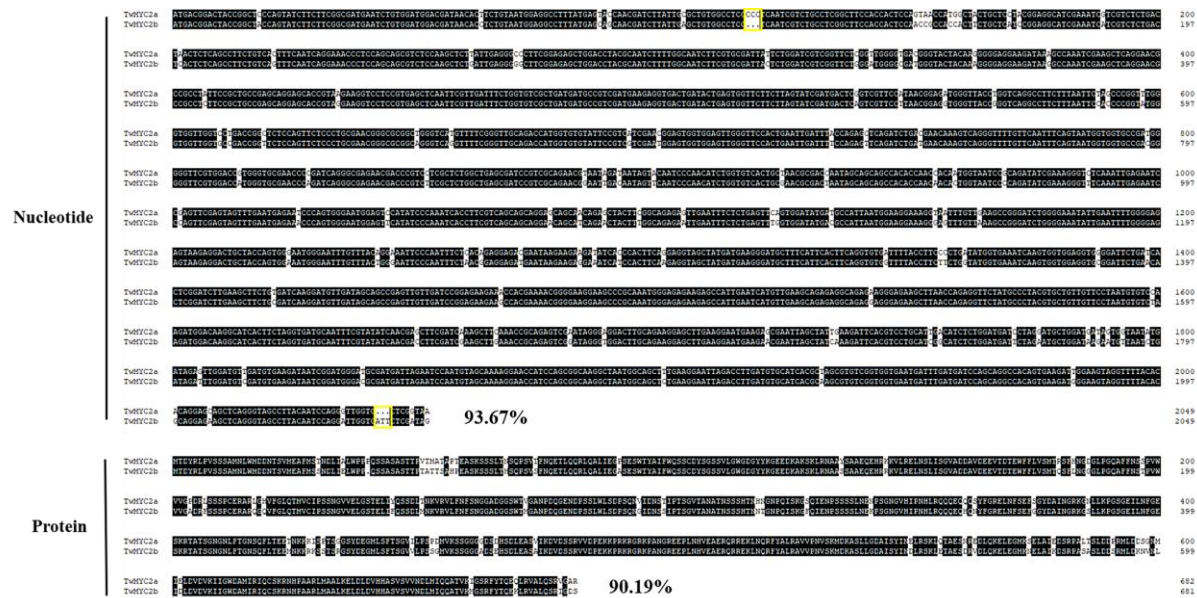

**Figure S5.** Alignment the full-length CDSs and protein sequences between *TwMYC2a* and *TwMYC2b*. Yellow boxes indicate the gaps of nucleotide sequences between *TwMYC2a* and *TwMYC2b*.

*TwMYC2a* ATGACGGACTACCGG... 190  
*TwMYC2b* ATGACGGACTACCGG... 187  
*TwMYC2a* CGCTCTGACTAT... 380  
*TwMYC2b* CGCTCTGACTAT... 377  
**RNAi-3**  
*TwMYC2a* CAATCGAAGCTCAGGAACCGCCCTAT... 570  
*TwMYC2b* CAATCGAAGCTCAGGAACCGCCCTAT... 567  
**RNAi-2**  
*TwMYC2a* CAGGCTTCTTAAT... 760  
*TwMYC2b* CAGGCTTCTTAAT... 757  
*TwMYC2a* TCAGGTTTTTTCAGTAAT... 950  
*TwMYC2b* TCAGGTTTTTTCAGTAAT... 947  
*TwMYC2a* CAGTCCATGGTAAT... 1140  
*TwMYC2b* CAGTCCATGGTAAT... 1137  
*TwMYC2a* ATGTGGGAGAG... 1330  
*TwMYC2b* ATGTGGGAGAG... 1327  
*TwMYC2a* TCACCTCAGGTGC... 1520  
*TwMYC2b* TCACCTCAGGTGC... 1517  
*TwMYC2a* TTTTGAAGCAGAG... 1710  
*TwMYC2b* TTTTGAAGCAGAG... 1707  
**RNAi-1**  
*TwMYC2a* CGAATGAGAG... 1900  
*TwMYC2b* CGAATGAGAG... 1897  
*TwMYC2a* TGAAGGANTTAGC... 2049  
*TwMYC2b* TGAAGGANTTAGC... 2049

**Figure S6.** Positions of the three RNAi fragments exist in the cDNA of *TwMYC2a*. RNAi-1 (314 bp) fragment is marked with the red boxes. RNAi-2 (304 bp) fragment is marked with the green boxes. RNAi-3 (311 bp) fragment is marked with the yellow boxes.

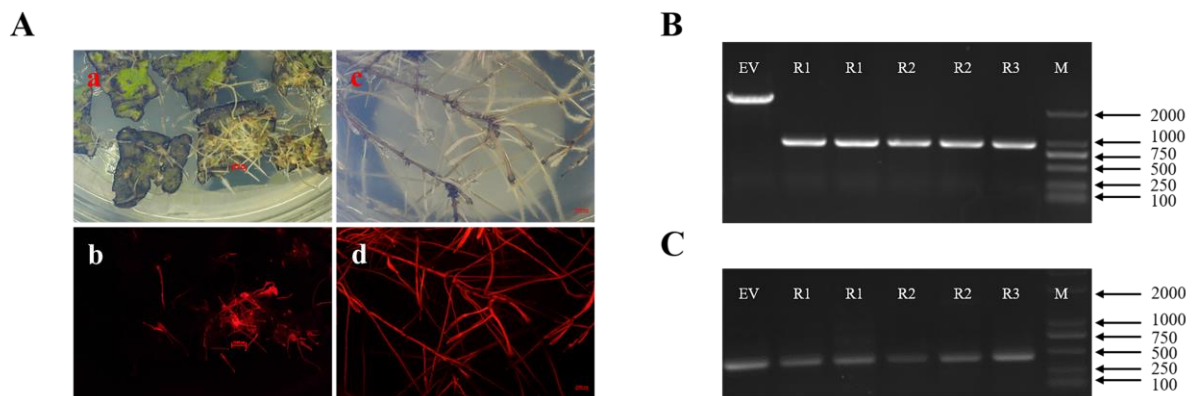

**Figure S7.** Identification of RNAi transgenic hairy roots lines. (A) DsRed-positive hairy roots under fluorescence microscopy with white light, (a) and (c), and exciting light, (b) and (d). The hairy root lines were acquired from the transformation of leaf explants of the *T. wilfordii* sterile plantlets (B) and (C): PCR analysis further confirmed the positive transgenic hairy root lines that has been identified by fluorescence identification. M: DL 2000 DNA marker. EV: control hairy root; R1, R2, and R3: RNAi transgenic hairy roots containing the corresponding RNAi vector, pKR-RNAi-1, pKR-RNAi-2, and pKR-RNAi-3, respectively, and have been identified by fluorescence identification. The sequencing primers pKR-F: 5'-CACTATCCTTCGCAAGACCCT-3' and pKR-R: 5'-CTCTGGAGTGAATACCACGACGAT-3' were used to validate the transformed hairy roots in (B). The rolB gene in RNAi transgenic hairy roots was verified by PCR with primers rolB-F: 5'-GCTCTTGCAGTGCTAGATTT-3' and rolB-R: 5'-GAAGGTGCAAGCTACCTCTC-3' (C).

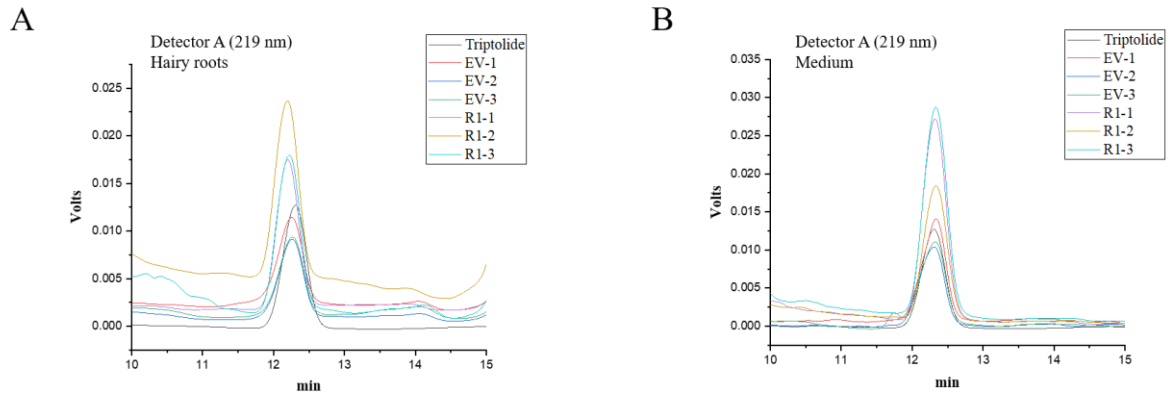

**Figure S8.** Chromatograms of the standard Triptolide and samples (three biological replicates of EV and R1 hairy roots line). (A) The detection of triptolide in hairy roots of EV and R1 lines by HPLC. (B) The detection of triptolide in the medium of EV and R1 hairy roots lines by HPLC.

|                |                                                                              |     |
|----------------|------------------------------------------------------------------------------|-----|
| TwMYC2a-3'-UTR | GACATTGAACATATTCAAGTCTAATAATATGCAATCGGGATGGACATTAATGGGGCAGGATTAGGGACATTTTA   | 75  |
| TwMYC2b-3'-UTR | GACATTGAACATATTCAAGTCTAATAATATGCAATCGG.....ATTGGGGACATTTTA                   | 54  |
| TwMYC2a-3'-UTR | AGACTCCCGTCTGTATAATACIGTTCTTG...GATAGTATTTAGTCATTTTGAGCTTGAGTTCATTTAGAT      | 146 |
| TwMYC2b-3'-UTR | AGACTCCCGTCTGTATAATATGTTCTTGCTGTCTGGTTAGTAGTCATTTTCGAGCTTGAGTTCATTAGAT       | 128 |
| TwMYC2a-3'-UTR | TGAGGACTGAACTAAGGGAAAATAGCATCGGTTCCGTTAGTTCAGGATTTCAAGTCCAAAACATTATTAGGCTCT  | 221 |
| TwMYC2b-3'-UTR | TGAGTAGCTGAACTAAGGGAAAATCGCATCGGT.....                                       | 161 |
| TwMYC2a-3'-UTR | CATCTGCGGAAAAGATTTTCTATTGGCCATCCTTCTGTTAAGTATAATAATGTCACTG.....              | 283 |
| TwMYC2b-3'-UTR | .....AGTTGAAGATTTTGCATTGGTCATCCCTCTGTATGTAATAATAATGTCACTAAATTAAGGTGATC       | 230 |
| TwMYC2a-3'-UTR | .....                                                                        | 283 |
| TwMYC2b-3'-UTR | AAAGTTTCATGCTATGAGCGGTAATCCTGCTTCACTGTTCCFTGGGATTAACITCTGTTGTATCATTGCCTTA    | 305 |
| TwMYC2a-3'-UTR | .....                                                                        | 283 |
| TwMYC2b-3'-UTR | TTGTTCTTCAGACCTCCTATGGTTACTTTTTCCCTGGGGAAGAAGATTCATGAGACAGATATGAATTGAAATCAGA | 380 |
| TwMYC2a-3'-UTR | .....                                                                        | 283 |
| TwMYC2b-3'-UTR | AACTTCTGTTGGGTGCTG                                                           | 398 |

**Figure S9.** Primers were designed in the 3'-untranslated region (3'-UTR) of *TwMYC2a/b* for qRT-PCR assays of *TwMYC2a/b*.
